# Supplementary material for: A Unique Class of Conditional sir2 Mutants Displays Distinct Silencing Defects in Saccharomyces cerevisiae
Source: Oxford University Press journal article supplement (doi:10.1093/genetics/162.2.721), 2002-10-01
Supplement: 3798supplementary_material.pdf [file 3798supplementary_material.pdf]

Supplemental data:

LPY4594 W303-1a *sir2Δ::TRP1* (LPY1557) + pLP60  
LPY4595 W303-1a *sir2Δ::TRP1* (LPY1557) + pLP285  
LPY4596 W303-1a *sir2Δ::TRP1* (LPY1557) + pLP1102  
LPY4597 W303-1a *sir2Δ::TRP1* (LPY1557) + pLP1110  
LPY4598 W303-1a *sir2Δ::TRP1* (LPY1557) + pLP1112  
LPY4599 W303-1a *sir1Δ::LEU2 sir2Δ::TRP1* (LPY3439) + pLP60  
LPY4600 W303-1a *sir1Δ::LEU2 sir2Δ::TRP1* (LPY3439) + pLP285  
LPY4601 W303-1a *sir1Δ::LEU2 sir2Δ::TRP1* (LPY3439) + pLP1102  
LPY4602 W303-1a *sir1Δ::LEU2 sir2Δ::TRP1* (LPY3439) + pLP1110  
LPY4603 W303-1a *sir1Δ::LEU2 sir2Δ::TRP1* (LPY3439) + pLP1112  
LPY4604 W303-1a *sir2Δ::TRP1* (LPY1557) + pLP1137  
LPY4605 W303-1a *sir1Δ::LEU2 sir2Δ::TRP1* (LPY3439) + pLP1137  
LPY4750 W303-1b (LPY79) + pLP60  
LPY4751 W303-1b (LPY79) + pLP285  
LPY4752 W303-1b (LPY79) + pLP1102  
LPY4753 W303-1b (LPY79) + pLP1110  
LPY4754 W303-1b (LPY79) + pLP1112

LPY4755 W303-1b *sir2Δ::TRP1* (LPY4627) + pLP60  
LPY4756 W303-1b *sir2Δ::TRP1* (LPY4627) + pLP285  
LPY4757 W303-1b *sir2Δ::TRP1* (LPY4627) + pLP1102  
LPY4758 W303-1b *sir2Δ::TRP1* (LPY4627) + pLP1110  
LPY4759 W303-1b *sir2Δ::TRP1* (LPY4627) + pLP1112  
LPY4760 W303-1b *sir1Δ::LEU2 sir2Δ::TRP1* (LPY3440) + pLP60  
LPY4761 W303-1b *sir1Δ::LEU2 sir2Δ::TRP1* (LPY3440) + pLP285  
LPY4762 W303-1b *sir1Δ::LEU2 sir2Δ::TRP1* (LPY3440) + pLP1102  
LPY4763 W303-1b *sir1Δ::LEU2 sir2Δ::TRP1* (LPY3440) + pLP1110  
LPY4764 W303-1b *sir1Δ::LEU2 sir2Δ::TRP1* (LPY3440) + pLP1112  
LPY4788 W303-1b *sir1Δ::LEU2* (LPY80) + pLP60  
LPY4789 W303-1b *sir1Δ::LEU2* (LPY80)+ pLP285  
LPY4790 W303-1b *sir1Δ::LEU2* (LPY80)+ pLP1102  
LPY4791 W303-1b *sir1Δ::LEU2* (LPY80)+ pLP1110  
LPY4792 W303-1b *sir1Δ::LEU2* (LPY80)+ pLP1112  
LPY4805 W303-1a (LPY5) + pLP60  
LPY4806 W303-1a (LPY5) + pLP285  
LPY4807 W303-1a (LPY5) + pLP1102  
LPY4808 W303-1a (LPY5) + pLP1110

LPY4809 W303-1a (LPY5) + pLP1112

LPY4810 W303-1a *sir1Δ::LEU2* (LPY6) + pLP60

LPY4811 W303-1a *sir1Δ::LEU2* (LPY6) + pLP285

LPY4812 W303-1a *sir1Δ::LEU2* (LPY6) + pLP1102

LPY4813 W303-1a *sir1Δ::LEU2* (LPY6) + pLP1110

LPY4814 W303-1a *sir1Δ::LEU2* (LPY6) + pLP1112

LPY4859 YCB652 *sir2Δ2::TRP1 ADH4::URA3-TEL* (LPY1953) + pLP62

LPY4860 YCB652 *sir2Δ2::TRP1 ADH4::URA3-TEL* (LPY1953) + pLP1237

LPY4861 YCB652 *sir2Δ2::TRP1 ADH4::URA3-TEL* (LPY1953) + pLP1187

LPY4862 YCB652 *sir2Δ2::TRP1 ADH4::URA3-TEL* (LPY1953) + pLP1188

LPY4863 YCB652 *sir2Δ2::TRP1 ADH4::URA3-TEL* (LPY1953) + pLP1189

LPY4864 YCB647 *ADH4::URA3-TEL* (LPY1954 ) + pLP62

LPY4865 YCB647 *ADH4::URA3-TEL* (LPY1954) + pLP1237

LPY4866 YCB647 *ADH4::URA3-TEL* (LPY1954) + pLP1187

LPY4867 YCB647 *ADH4::URA3-TEL* (LPY1954 ) + pLP1188

LPY4868 YCB647 *ADH4::URA3-TEL* (LPY1954 ) + pLP1189

LPY5191 JS128 (S6) (LPY2446) + pLP62

LPY5192 JS128 (S6) (LPY2446) + pLP1237

LPY5193 JS128 (S6) (LPY2446) + pLP1187

LPY5194 JS128 (S6) (LPY2446) + pLP1188

LPY5195 JS128 (S6) (LPY2446) + pLP1189

LPY5196 JS163 (S6) *sir2Δ2::HIS3 RDN:: Ty1 -mURA3* (LPY2447) + pLP62

LPY5197 JS163 (S6) *sir2Δ2::HIS3 RDN:: Ty1 -mURA3* (LPY2447) + pLP1237

LPY5198 JS163 (S6) *sir2Δ2::HIS3 RDN:: Ty1 -mURA3* (LPY2447) + pLP1187

LPY5199 JS163 (S6) *sir2Δ2::HIS3 RDN:: Ty1 -mURA3* (LPY2447) + pLP1188

LPY5200 JS163 (S6) *sir2Δ2::HIS3 RDN:: Ty1 -mURA3* (LPY2447) + pLP1189

LPY5621 W303-1b *sir2::TRP1 net1::Myc9-Net1/LEU2* (LPY5615) + pLP60

LPY5622 W303-1b *sir2::TRP1 net1::Myc9-Net1/LEU2* (LPY5615) + pLP285

LPY5623 W303-1b *sir2::TRP1 net1::Myc9-Net1/LEU2* (LPY5615) + pLP1102

LPY5624 W303-1b *sir2::TRP1 net1::Myc9-Net1/LEU2* (LPY5615) + pLP1110

LPY5625 W303-1b *sir2::TRP1 net1::Myc9-Net1/LEU2* (LPY5615) + pLP1112

LPY5637 W303-1b *sir2::KanMX4 RDN1::4XUASg-mURA3-HIS3* (LPY5378) + pLP956

LPY5638 W303-1b *sir2::KanMX4 RDN1::4XUASg-mURA3-HIS3* (LPY5378) + pLP1073

LPY5639 W303-1b *sir2::KanMX4 RDN1::4XUASg-mURA3-HIS3* (LPY5378) + pLP1074

LPY5640 W303-1b *sir2::KanMX4 RDN1::4XUASg-mURA3-HIS3* (LPY5378) + pLP1369

LPY5641 W303-1b *sir2::KanMX4 RDN1::4XUASg-mURA3-HIS3* (LPY5378) + pLP1370

LPY5642 W303-1b *sir2::KanMX4 RDN1::4XUASg-mURA3-HIS3* (LPY5378) + pLP1371

LPY5658 W303-1b *adh4::URA3-1XUAS (C1-3)n* (LPY1030) +pLP956

LPY5659 W303-1b adh4::*URA3-1XUAS* (C1-3)n (LPY1030) +pLP1073

LPY5660 W303-1b adh4::*URA3-1XUAS* (C1-3)n (LPY1030) +pLP1074

LPY5661 W303-1b adh4::*URA3-1XUAS* (C1-3)n (LPY1030) +pLP1369

LPY5662 W303-1b adh4::*URA3-1XUAS* (C1-3)n (LPY1030) +pLP1370

LPY5663 W303-1b adh4::*URA3-1XUAS* (C1-3)n (LPY1030) +pLP1371

LPY5777 W303-1a *sir2::HIS3* adh4::*URA3-1xUASGBD*(C1-3A)n (LPY5611)+ pLP956

LPY5778 W303-1a *sir2::HIS3* adh4::*URA3-1xUASGBD*(C1-3A)n (LPY5611)+ pLP1073

LPY5779 W303-1a *sir2::HIS3* adh4::*URA3-1xUASGBD*(C1-3A)n (LPY5611)+ pLP1074

LPY5780 W303-1a *sir2::HIS3* adh4::*URA3-1xUASGBD*(C1-3A)n (LPY5611)+ pLP1369

LPY5781 W303-1a *sir2::HIS3* adh4::*URA3-1xUASGBD*(C1-3A)n (LPY5611)+ pLP1370

LPY5782 W303-1a *sir2::HIS3* adh4::*URA3-1xUASGBD*(C1-3A)n (LPY5611)+ pLP1371

LPY6377 W303-1a *sir2::HIS3* adh4::*URA3-1XUAS* (C1-3)n (LPY5611)+pLP62/pLP118

LPY6378 W303-1a *sir2::HIS3* adh4::*URA3-1XUAS* (C1-3)n (LPY5611)+pLP62/pLP762

LPY6379 W303-1a *sir2::HIS3* adh4::*URA3-1XUAS* (C1-3)n (LPY5611)+pLP1237/pLP118

LPY6380 W303-1a *sir2::HIS3* adh4::*URA3-1XUAS* (C1-3)n (LPY5611)+pLP1237/pLP762

LPY6381 W303-1a *sir2::HIS3* adh4::*URA3-1XUAS* (C1-3)n (LPY5611)+pLP1187/pLP118

LPY6382 W303-1a *sir2::HIS3* adh4::*URA3-1XUAS* (C1-3)n (LPY5611)+pLP1187/pLP762

LPY6383 W303-1a *sir2::HIS3* adh4::*URA3-1XUAS* (C1-3)n (LPY5611)+pLP1188/pLP118

LPY6284 W303-1a *sir2::HIS3* adh4::*URA3-1XUAS* (C1-3)n (LPY5611)+pLP1188/pLP762

LPY6385 W303-1a *sir2::HIS3 adh4::URA3-1XUAS (C1-3)n (LPY5611)+pLP1189/pLP118*

LPY6386 W303-1a *sir2::HIS3 adh4::URA3-1XUAS (C1-3)n (LPY5611)+pLP1189/pLP762*

LPY6402 W303-1b *sir1::URA3 sir2::TRP1 net1::Myc9-Net1/LEU2 (LPY6400) + pLP60*

LPY6403 W303-1b *sir1::URA3 sir2::TRP1 net1::Myc9-Net1/LEU2 (LPY6400) + pLP1285*

LPY6404 W303-1b *sir1::URA3 sir2::TRP1 net1::Myc9-Net1/LEU2 (LPY6400) + pLP1102*

LPY6405 W303-1b *sir1::URA3 sir2::TRP1 net1::Myc9-Net1/LEU2 (LPY6400) + pLP1110*

LPY6406 W303-1b *sir1::URA3 sir2::TRP1 net1::Myc9-Net1/LEU2 (LPY6400) + pLP1112*

LPY6507 W303-1a *sir2::TRP1 adh4::URA3-1XUAS (C1-3)n (LPY4624)+pLP62/pLP114*

LPY6508 W303-1a *sir2::TRP1 adh4::URA3-1XUAS(C1-3)n(LPY4624)+pLP1237/pLP114*

LPY6509 W303-1a *sir2::TRP1 adh4::URA3-1XUAS(C1-3)n(LPY4624)+pLP1187/pLP114*

LPY6510 W303-1a *sir2::TRP1 adh4::URA3-1XUAS(C1-3)n(LPY4624)+pLP1188/pLP114*

LPY6511 W303-1a *sir2::TRP1 adh4::URA3-1XUAS(C1-3)n(LPY4624)+pLP1189/pLP114*
